# Supplementary material for: Andrographolide and Deoxyandrographolide Inhibit Protease and IFN-Antagonist Activities of Foot-and-Mouth Disease Virus 3Cpro
Source: MDPI journal article supplement (doi:10.3390/ani12151995), 2022-08-07
Supplement: s1 [file s1]

## Supplementary data

### Supplementary figures

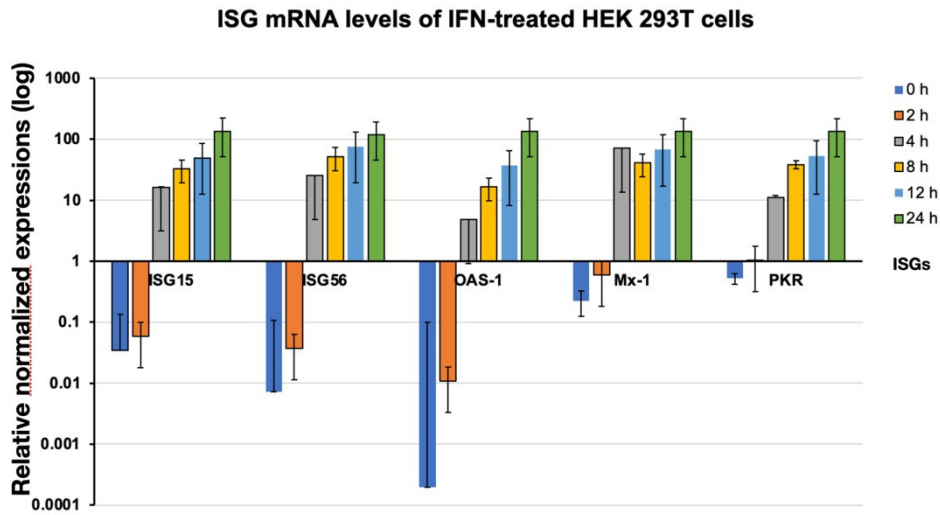

**Figure S1.** The optimal time point for detecting ISG mRNA transcript levels in IFN- $\beta$  treated HEK 293T cells in this study. The ISG transcript levels were down-regulated from 0 to 2 h, and gradually increased from 4 to 24 h. At the 8 h, the significantly high ISG expressions in IFN-treated cells were observed using real-time qPCR.

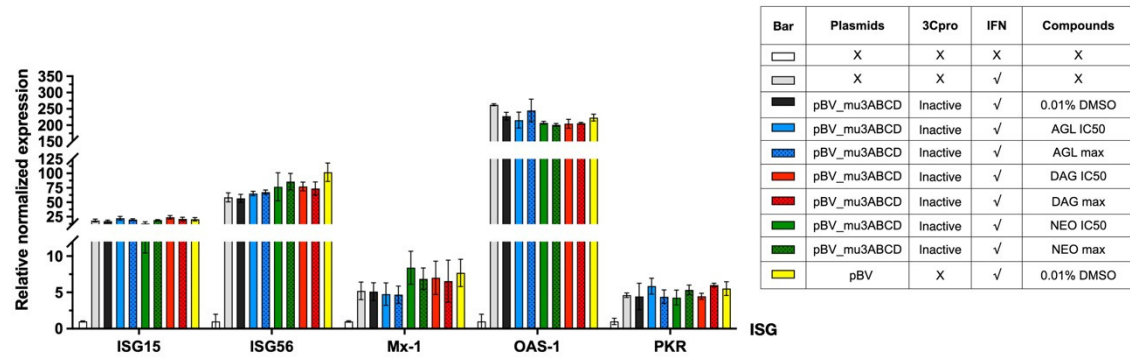

**Figure S2.** The mRNA expression levels of the Interferon-Stimulated Genes (ISGs) in HEK 293T cells transfected with the empty vector pBV or pBV\_mu3ABCD. pBV\_mu3ABCD expressed the full-length 3B and inactive 3C<sup>pro</sup> (3C<sup>pro</sup>-). The data presents as means and SD.

**Supplementary Table S1.** ISG mRNA expression of HEK 293T cells transfected with FMDV 3C<sub>pro</sub> compared to mock control.

| ISG   | mRNA expression (fold-changes)* |             |        |        |        |        |        |        |
|-------|---------------------------------|-------------|--------|--------|--------|--------|--------|--------|
| genes | mock                            | mock        | AGL    |        | DAG    |        | NEO    |        |
|       | treated,                        | treated,    | IC50   | Maximu | IC50   | Maxim  | IC50   | Maximu |
|       | non-                            | transfect   | dose   | m dose | dose   | um     | dose   | m dose |
|       | transfect                       | ed cell     |        |        |        | dose   |        |        |
|       | ed cell                         |             |        |        |        |        |        |        |
| ISG15 | <b>51.39</b>                    | 29.51       | 52.93  | 59.99  | 62.36  | 64.43  | 37.58  | 32.91  |
| ISG56 | 90.80                           | 59.05       | 72.73  | 107.66 | 84.77  | 77.60  | 62.33  | 55.39  |
| Mx-1  | 5.99                            | <b>1.49</b> | 5.33   | 6.98   | 14.37  | 13.04  | 2.19   | 4.00   |
| OAS-1 | 178.30                          | 82.15       | 238.78 | 191.71 | 250.25 | 244.76 | 106.88 | 163.69 |
| PKR   | 5.02                            | 1.68        | 6.12   | 6.22   | 12.84  | 11.65  | 1.99   | 3.65   |

\*Italics show a significantly difference of ISG mRNA expression in IFN-treated, transfected HEK 293T cells with compounds compared to those 3C<sub>pro</sub> expressing cells without compounds.
